# Supplementary material
Source: PubMed Central journal article supplement (PMC5082234)
Supplement: NIHMS818454-supplement-1.pdf [file NIHMS818454-supplement-1.pdf]

Supplemental materials PDF file for Savtchouk et al. contains:

Supplementary Figures S1-S8

Supplemental Table S1

Methods

Supplementary references

Other associated files for this article provided separately:

Supplemental information inventory

Figure files (uploaded separately as individual files)

Graphical abstract

Slider image

Highlights and ETOC blurb
